# Supplementary material
Source: publisher site journal article supplement (https://www.dovepress.com/article/235267)
Supplement: Supplementary file 1 [file get_supplementary_file.php]

**Supplementary Information**

**Intravitreal aflibercept versus laser photocoagulation in Asian patients with diabetic macular edema: the VIVID-East study**

Youxin Chen, Xiaoxin Li, Young Hee Yoon, Xiaodong Sun, Yury Astakhov, Xu Gezhi, Hui Wang, Xiaowei Ren, Friedrich Asmus; on behalf of the VIVID-East investigators

**VIVID-East study sites**

The VIVID-East study was conducted in 25 sites in 4 countries: China (18), Hong Kong (2), Korea (2), and Russia (3).

**China**

| - Peking Union Medical College Hospital, Ophthalmology Department,   Beijing |
| --- |
| - Beijing Tongren Hospital, Capital Medical University, Ophthalmology Department,   Beijing |
| - Peking University People's Hospital, Ophthalmology Department,   Beijing |
| - Eye & ENT Hospital of Fudan University, Ophthalmology Department,   Shanghai |
| - The Affiliated Eye Hospital of Wenzhou Medical College, Ophthalmology Department, Zhejiang |
| - West China Hospital of Sichuan University, Ophthalmology Department,   Sichuan |
| - Zhongshan Ophthalmic Center, SUN YAT-SEN University, Ophthalmology   Department, Guangdong |
| - The 1st Affiliated Hosp of the 4th Military Med University,   Shaanxi |
| - 2nd Affiliated Hospital, Zhejiang University College of Medicine, Ophthalmology Department, Zhejiang |
| - 2nd Xiangya Hospital, Central South University, Ophthalmology Department,   Hunan |
| - Qingdao Eye Hospital, Ophthalmology Department,   Shandong |
| - Tianjin Medical University Eye Center,   Nankai District |
| - Shanghai First People's Hospital, Ophthalmology Department,   Beijing |
| - Tianjin eye hospital,   Tianjin |
| - Shenyang He Eye Hospital,   Shenyang |
| - The Third Affiliated Hospital of Third Military Medical University,   Chongqing |
| - Renmin Hospital, Wuhan University,   Hubei |
| - Beijing Friendship Hospital,   Beijing |

**Hong Kong**

| - Hong Kong Eye Hospital,   Kowloon |
| --- |
| - Queen Mary Hospital, The Eye Institute,   Hong Kong |

**Republic of Korea**

| - Samsung Medical Center,   Seoul |
| --- |
| - Asan Medical Center,   Seoul |

**Russian Federation**

| - St. Petersburg Medical University n.a. Pavlov,   St. Petersburg |
| --- |
| - FBSI IRTC Eye Microsurgery n.a. acad. S.N. Fyodorov,   Moscow |
| - Novosibirsk Branch of FBSI IRTC Eye Microsurgery,   Novosibirsk |
